# Supplementary material for: A retrospective comparative study of anesthesia with remimazolam and remifentanil versus dexmedetomidine and remifentanil for transcatheter aortic valve replacement
Source: PubMed Central journal article supplement (PMC10564871; doi:10.1038/s41598-023-43895-0), 2023-10-10
Supplement: 41598_2023_43895_MOESM2_ESM.pdf [file 41598_2023_43895_MOESM2_ESM.pdf]

## Supplement 2. Evaluation of Propensity Score (C statistic)

| C statistic | 95% CI        | P-value |
|-------------|---------------|---------|
| 0.649       | 0.574 , 0.723 | < 0.001 |

Propensity score calculation variables: sex, age, body mass index, New York Heart Association Classification, Euro 2 Score, aortic valve area, mean pressure gradient across the aortic valve, left ventricle ejection fraction, history of hypertension, history of ischemic heart disease
