# Supplementary material for: A retrospective comparative study of anesthesia with remimazolam and remifentanil versus dexmedetomidine and remifentanil for transcatheter aortic valve replacement
Source: PubMed Central journal article supplement (PMC10564871; doi:10.1038/s41598-023-43895-0), 2023-10-10

Supplement 4. ROC Curve of C statistic

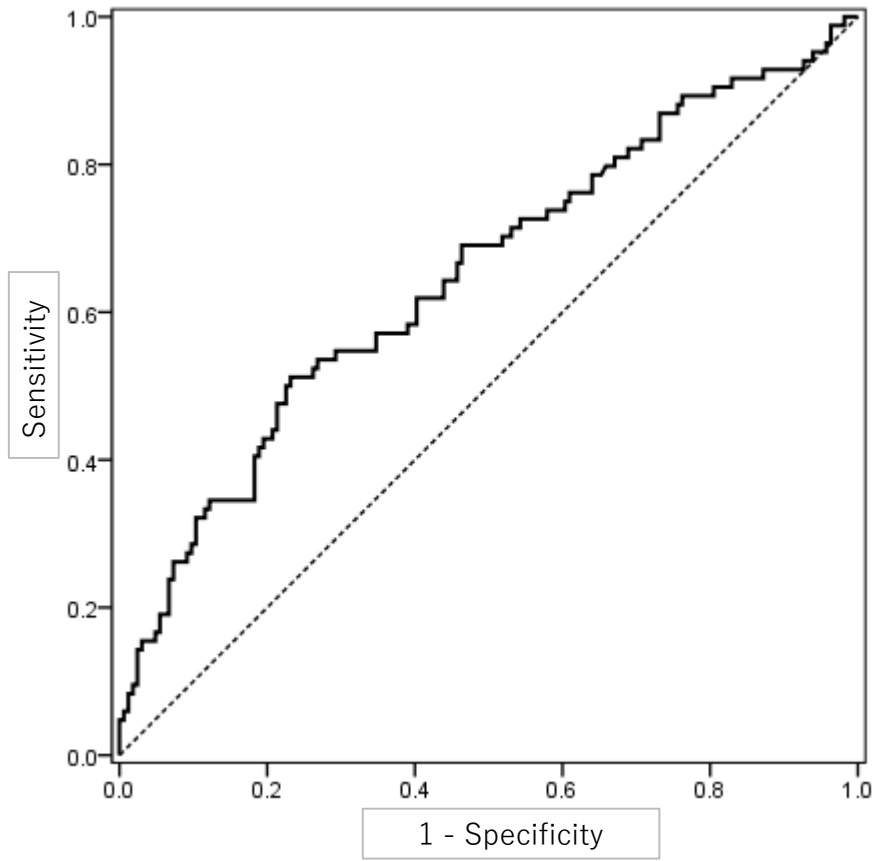

Supplement: 41598_2023_43895_MOESM4_ESM.pdf [file 41598_2023_43895_MOESM4_ESM.pdf]
